# Supplementary material for: Nutritional Health Knowledge and Literacy among Pregnant Women in the Czech Republic: Analytical Cross-Sectional Study
Source: MDPI journal article supplement (doi:10.3390/ijerph20053931), 2023-02-22
Supplement: s1 [file s1]

**Table S1.** Nutritional Health Knowledge Items of Pregnant Women Participating in the Nutritional Health Survey, April – May 2022, (*n* = 401)

| No. | Question                                                                         | Answer                                                              | Pre-University<br>( <i>n</i> = 171) | University<br>( <i>n</i> = 230) | Total<br>( <i>n</i> = 401) | Sig.    |
|-----|----------------------------------------------------------------------------------|---------------------------------------------------------------------|-------------------------------------|---------------------------------|----------------------------|---------|
| 1   | Which of the following foods is a significant source of iron?                    | <b>Meat</b>                                                         | <b>126 (73.7%)</b>                  | <b>196 (85.2%)</b>              | <b>322 (80.3%)</b>         | 0.006*  |
|     |                                                                                  | Dairy products                                                      | 6 (3.5%)                            | 2 (0.9%)                        | 8 (2%)                     |         |
|     |                                                                                  | Fruits and vegetables                                               | 26 (15.2%)                          | 16 (7%)                         | 42 (10.5%)                 |         |
|     |                                                                                  | I do not know                                                       | 8 (4.7%)                            | 5 (2.2%)                        | 13 (3.2%)                  |         |
| 2   | Which of the vitamins supports the absorption of iron in the body?               | <b>Vitamin C</b>                                                    | <b>38 (22.2%)</b>                   | <b>65 (28.3%)</b>               | <b>103 (25.7%)</b>         | 0.149*  |
|     |                                                                                  | Vitamin A                                                           | 21 (12.3%)                          | 24 (10.4%)                      | 45 (11.2%)                 |         |
|     |                                                                                  | Vitamin D                                                           | 32 (18.7%)                          | 56 (24.3%)                      | 88 (21.9%)                 |         |
|     |                                                                                  | I do not know                                                       | 80 (46.8%)                          | 84 (36.5%)                      | 164 (40.9%)                |         |
| 3   | Can a pregnant woman cover the daily need for iron only with a plant-based diet? | Yes                                                                 | 43 (25.1%)                          | 51 (22.2%)                      | 94 (23.4%)                 | 0.683   |
|     |                                                                                  | <b>No</b>                                                           | <b>85 (49.7%)</b>                   | <b>124 (53.9%)</b>              | <b>209 (52.1%)</b>         |         |
|     |                                                                                  | I do not know                                                       | 43 (25.1%)                          | 55 (23.9%)                      | 98 (24.4%)                 |         |
|     |                                                                                  | Optimal growth and development of the child                         | 20 (11.7%)                          | 17 (7.4%)                       | 37 (9.2%)                  |         |
| 4   | What is the reason for the increased need for iron in pregnancy?                 | <b>Prevention of anaemia in the mother and the developing fetus</b> | <b>113 (66.1%)</b>                  | <b>180 (78.3%)</b>              | <b>293 (73.1%)</b>         | 0.013*  |
|     |                                                                                  | Proper development of the child's nervous system                    | 19 (11.1%)                          | 15 (6.5%)                       | 34 (8.5%)                  |         |
|     |                                                                                  | I do not know                                                       | 19 (11.1%)                          | 14 (6.1%)                       | 33 (8.2%)                  |         |
|     |                                                                                  | Meat                                                                | 4 (2.3%)                            | 4 (1.7%)                        | 8 (2%)                     |         |
| 5   | Which of the following foods is the richest source of folic acid?                | Dairy products                                                      | 6 (3.5%)                            | 20 (8.7%)                       | 26 (6.5%)                  | 0.156*  |
|     |                                                                                  | <b>Fruits and vegetables</b>                                        | <b>146 (85.4%)</b>                  | <b>191 (83%)</b>                | <b>337 (84%)</b>           |         |
|     |                                                                                  | I do not know                                                       | 15 (8.8%)                           | 15 (6.5%)                       | 30 (7.5%)                  |         |
|     |                                                                                  | 200 µg                                                              | 12 (7%)                             | 4 (1.7%)                        | 16 (4%)                    |         |
| 6   | What is the recommended daily amount of folic acid for a pregnant woman?         | <b>400 µg</b>                                                       | <b>50 (29.2%)</b>                   | <b>107 (46.5%)</b>              | <b>157 (39.2%)</b>         | <0.001  |
|     |                                                                                  | 600 µg                                                              | 29 (17%)                            | 38 (16.5%)                      | 67 (16.7%)                 |         |
|     |                                                                                  | I do not know                                                       | 80 (46.8%)                          | 81 (35.2%)                      | 161 (40.1%)                |         |
|     |                                                                                  | Prevention of bone deformities                                      | 21 (12.3%)                          | 20 (8.7%)                       | 41 (10.2%)                 |         |
| 7   | What is the reason for the increased need for folic acid in pregnancy?           | <b>Prevention of cleft neural tube and cleft lip</b>                | <b>56 (32.7%)</b>                   | <b>118 (51.3%)</b>              | <b>174 (43.4%)</b>         | <0.001* |
|     |                                                                                  | Growth retardation (slowing down of growth)                         | 38 (22.2%)                          | 55 (23.9%)                      | 93 (23.2%)                 |         |
|     |                                                                                  | I do not know                                                       | 55 (32.2%)                          | 36 (15.7%)                      | 91 (22.7%)                 |         |
|     |                                                                                  | <b>Milk and dairy products</b>                                      | <b>151 (88.3%)</b>                  | <b>211 (91.7%)</b>              | <b>362 (90.3%)</b>         |         |
| 8   | Which foods are an important, well-usable source of calcium for the body?        | Legumes                                                             | 10 (5.8%)                           | 11 (4.8%)                       | 21 (5.2%)                  | 0.667*  |
|     |                                                                                  | Egg                                                                 | 5 (2.9%)                            | 3 (1.3%)                        | 8 (2%)                     |         |
|     |                                                                                  | I do not know                                                       | 3 (1.8%)                            | 2 (0.9%)                        | 5 (1.2%)                   |         |
|     |                                                                                  | <b>Cruciferous vegetables (broccoli, cauliflower, etc)</b>          | <b>47 (27.5%)</b>                   | <b>93 (40.4%)</b>               | <b>140 (34.9%)</b>         |         |
| 9   | From which type of vegetable is calcium best usable for the human body?          | Root vegetables (carrots, parsley, celery)                          | 23 (13.5%)                          | 10 (4.3%)                       | 33 (8.2%)                  | 0.001*  |

|    |                                                                                                               |                                                                  |                    |                    |                    |         |
|----|---------------------------------------------------------------------------------------------------------------|------------------------------------------------------------------|--------------------|--------------------|--------------------|---------|
|    |                                                                                                               | Leafy vegetables (lettuce, etc)                                  | 24 (14%)           | 23 (10%)           | 47 (11.7%)         |         |
|    |                                                                                                               | I do not know                                                    | 76 (44.4%)         | 104 (45.2%)        | 180 (44.9%)        |         |
|    |                                                                                                               | <b>Proper formation of the child's bones and teeth</b>           | <b>149 (87.1%)</b> | <b>204 (88.7%)</b> | <b>353 (88%)</b>   |         |
| 10 | Why is it recommended that pregnant women increase their daily calcium intake?                                | Development of the child's central nervous system                | 5 (2.9%)           | 8 (3.5%)           | 13 (3.2%)          | 0.338*  |
|    |                                                                                                               | Prevention of genetic defects in the child                       | 1 (0.6%)           | 5 (2.2%)           | 6 (1.5%)           |         |
|    |                                                                                                               | I do not know                                                    | 15 (8.8%)          | 13 (5.7%)          | 28 (7%)            |         |
|    |                                                                                                               | <b>Fish</b>                                                      | <b>152 (88.9%)</b> | <b>221 (96.1%)</b> | <b>373 (93%)</b>   |         |
| 11 | Which of the listed foods is a significant source of $\omega$ -3 unsaturated fatty acids?                     | Dairy products                                                   | 2 (1.2%)           | 0 (0%)             | 2 (0.5%)           | <0.001* |
|    |                                                                                                               | Egg                                                              | 3 (1.8%)           | 0 (0%)             | 3 (0.7%)           |         |
|    |                                                                                                               | I do not know                                                    | 14 (8.2%)          | 5 (2.2%)           | 19 (4.7%)          |         |
|    |                                                                                                               | <b>For brain development</b>                                     | <b>126 (73.7%)</b> | <b>185 (80.4%)</b> | <b>311 (77.6%)</b> |         |
| 12 | Why is it recommended to increase the daily intake of $\omega$ -3 unsaturated fatty acids for pregnant women? | Abortion prevention                                              | 0 (0%)             | 3 (1.3%)           | 3 (0.7%)           | 0.111*  |
|    |                                                                                                               | Prevention of mental retardation                                 | 7 (4.1%)           | 5 (2.2%)           | 12 (3%)            |         |
|    |                                                                                                               | I do not know                                                    | 38 (22.2%)         | 37 (16.1%)         | 75 (18.7%)         |         |
|    |                                                                                                               | <b>Fish</b>                                                      | <b>82 (48%)</b>    | <b>115 (50%)</b>   | <b>197 (49.1%)</b> |         |
| 13 | Which of the listed foods is a significant source of vitamin D?                                               | Fruit                                                            | 24 (14%)           | 7 (3%)             | 31 (7.7%)          | <0.001* |
|    |                                                                                                               | Vegetables                                                       | 29 (17%)           | 37 (16.1%)         | 66 (16.5%)         |         |
|    |                                                                                                               | I do not know                                                    | 35 (20.5%)         | 64 (27.8%)         | 99 (24.7%)         |         |
|    |                                                                                                               | <b>Prevention of rickets (child) and bone softening (mother)</b> | <b>47 (27.5%)</b>  | <b>88 (38.3%)</b>  | <b>135 (33.7%)</b> |         |
| 14 | Why is it recommended to increase pregnant women's daily vitamin D intake?                                    | Development of child's vision                                    | 13 (%)             | 27 (%)             | 40 (%)             | 0.006*  |
|    |                                                                                                               | Development of child's central nervous system                    | 39 (%)             | 53 (%)             | 92 (%)             |         |
|    |                                                                                                               | I do not know                                                    | 71 (%)             | 58 (%)             | 129 (%)            |         |
|    |                                                                                                               | <b>Fish and seafood</b>                                          | <b>138 (80.7%)</b> | <b>206 (89.6%)</b> | <b>344 (85.8%)</b> |         |
| 15 | Which of the following foods is a significant source of iodine?                                               | Vegetables                                                       | 1 (0.6%)           | 0 (0%)             | 1 (0.2%)           | 0.070*  |
|    |                                                                                                               | Meat                                                             | 6 (3.5%)           | 4 (1.7%)           | 10 (2.5%)          |         |
|    |                                                                                                               | I do not know                                                    | 25 (14.6%)         | 19 (8.3%)          | 44 (11%)           |         |
|    |                                                                                                               | <b>Prevention of psychomotor disorders</b>                       | <b>55 (32.2%)</b>  | <b>109 (47.4%)</b> | <b>164 (40.9%)</b> |         |
| 16 | Why is it recommended to increase the daily intake of iodine for pregnant women?                              | Prevention of visual development disorders                       | 10 (5.8%)          | 9 (3.9%)           | 19 (4.7%)          | 0.013*  |
|    |                                                                                                               | Prevention of abortion                                           | 12 (7%)            | 7 (3%)             | 19 (4.7%)          |         |
|    |                                                                                                               | I do not know                                                    | 92 (53.8%)         | 104 (45.2%)        | 196 (48.9%)        |         |
|    |                                                                                                               | <b>Guts</b>                                                      | <b>61 (35.7%)</b>  | <b>118 (51.3%)</b> | <b>179 (44.6%)</b> |         |
| 17 | Which of the listed foods is a significant source of vitamin A?                                               | Fruits and vegetables                                            | 34 (19.9%)         | 40 (17.4%)         | 74 (18.5%)         | 0.004*  |
|    |                                                                                                               | Dairy products                                                   | 11 (6.4%)          | 6 (2.6%)           | 17 (4.2%)          |         |
|    |                                                                                                               | I do not know                                                    | 65 (38%)           | 63 (27.4%)         | 128 (31.9%)        |         |
|    |                                                                                                               | <b>Meat</b>                                                      | <b>158 (92.4%)</b> | <b>214 (93%)</b>   | <b>372 (92.8%)</b> |         |
| 18 | Which food is a rich source of protein?                                                                       | Vegetables                                                       | 4 (2.3%)           | 1 (0.4%)           | 5 (1.2%)           | 0.078*  |
|    |                                                                                                               | Cereals                                                          | 4 (2.3%)           | 11 (4.8%)          | 15 (3.7%)          |         |

|    |                                                                                          |                              |                    |                    |                    |         |
|----|------------------------------------------------------------------------------------------|------------------------------|--------------------|--------------------|--------------------|---------|
|    |                                                                                          | I do not know                | 5 (2.9%)           | 2 (0.9%)           | 7 (1.7%)           |         |
| 19 | Which food is a rich source of carbohydrates?                                            | Meat                         | 9 (5.3%)           | 12 (5.2%)          | 21 (5.2%)          |         |
|    |                                                                                          | <b>Legumes</b>               | <b>126 (73.7%)</b> | <b>192 (83.5%)</b> | <b>318 (79.3%)</b> | 0.038*  |
|    |                                                                                          | Egg                          | 16 (9.4%)          | 16 (7%)            | 32 (8%)            |         |
|    |                                                                                          | I do not know                | 19 (11.1%)         | 10 (4.3%)          | 29 (7.2%)          |         |
| 20 | Which food is a rich source of fat?                                                      | <b>Nuts</b>                  | <b>144 (84.2%)</b> | <b>223 (97%)</b>   | <b>367 (91.5%)</b> |         |
|    |                                                                                          | Rice                         | 1 (0.6%)           | 1 (0.4%)           | 2 (0.5%)           |         |
|    |                                                                                          | Banana                       | 13 (7.6%)          | 1 (0.4%)           | 14 (3.5%)          |         |
|    |                                                                                          | I do not know                | 13 (7.6%)          | 5 (2.2%)           | 18 (4.5%)          | <0.001* |
| 21 | How many servings of fruit (O) and vegetables (Z) should a pregnant woman consume daily? | <b>2 O + 3 Z</b>             | <b>61 (35.7%)</b>  | <b>116 (50.4%)</b> | <b>177 (44.1%)</b> |         |
|    |                                                                                          | 1 O + 3 Z                    | 32 (18.7%)         | 43 (18.7%)         | 75 (18.7%)         |         |
|    |                                                                                          | 3 O + 2 Z                    | 26 (15.2%)         | 21 (9.1%)          | 47 (11.7%)         | 0.013   |
|    |                                                                                          | I do not know                | 52 (30.4%)         | 50 (21.7%)         | 102 (25.4%)        |         |
| 22 | Fluid intake is recommended during pregnancy...                                          | 1 – 1.5 litre                | 9 (5.3%)           | 10 (4.3%)          | 19 (4.7%)          |         |
|    |                                                                                          | <b>1.5 – 3 litres</b>        | <b>115 (67.3%)</b> | <b>184 (80%)</b>   | <b>299 (74.6%)</b> | 0.005*  |
|    |                                                                                          | > 3 litres                   | 33 (19.3%)         | 29 (12.6%)         | 62 (15.5%)         |         |
|    |                                                                                          | I do not know                | 14 (8.2%)          | 5 (2.2%)           | 19 (4.7%)          |         |
| 23 | A pregnant woman should consume fish...                                                  | <b>1 – 2 times a week</b>    | <b>141 (82.5%)</b> | <b>211 (91.7%)</b> | <b>352 (87.8%)</b> |         |
|    |                                                                                          | 4 – 5 times a week           | 3 (1.8%)           | 6 (2.6%)           | 9 (2.2%)           |         |
|    |                                                                                          | Not at all                   | 6 (3.5%)           | 3 (1.3%)           | 9 (2.2%)           | 0.009*  |
|    |                                                                                          | I do not know                | 21 (12.3%)         | 10 (4.3%)          | 31 (7.7%)          |         |
| 24 | Salt consumption in pregnant women should be...                                          | Increased                    | 6 (3.5%)           | 6 (2.6%)           | 12 (3%)            |         |
|    |                                                                                          | <b>Decreased</b>             | <b>116 (67.8%)</b> | <b>127 (55.2%)</b> | <b>243 (60.6%)</b> | 0.012   |
|    |                                                                                          | Remained the same            | 29 (17%)           | 72 (31.3%)         | 101 (25.2%)        |         |
|    |                                                                                          | I do not know                | 20 (11.7%)         | 25 (10.9%)         | 45 (11.2%)         |         |
| 25 | How many times a day should a pregnant woman eat?                                        | <b>5 – 7 times a day</b>     | <b>119 (69.6%)</b> | <b>186 (80.9%)</b> | <b>305 (76.1%)</b> |         |
|    |                                                                                          | 2 – 4 times a day            | 28 (16.4%)         | 25 (10.9%)         | 53 (13.2%)         |         |
|    |                                                                                          | 3 times a day                | 7 (4.1%)           | 10 (4.3%)          | 17 (4.2%)          | 0.008*  |
|    |                                                                                          | I do not know                | 17 (9.9%)          | 7 (3%)             | 24 (6%)            |         |
| 26 | The need for protein is ... in the diet of a pregnant woman.                             | Lower                        | 4 (2.3%)           | 4 (1.7%)           | 8 (2%)             |         |
|    |                                                                                          | The same                     | 43 (25.1%)         | 39 (17%)           | 82 (20.4%)         |         |
|    |                                                                                          | <b>Higher</b>                | <b>93 (54.4%)</b>  | <b>162 (70.4%)</b> | <b>255 (63.6%)</b> | 0.009*  |
|    |                                                                                          | I do not know                | 31 (18.1%)         | 24 (10.4%)         | 55 (13.7%)         |         |
| 27 | During pregnancy, a woman should have ... fibre intake.                                  | Decreased                    | 6 (3.5%)           | 8 (3.5%)           | 14 (3.5%)          |         |
|    |                                                                                          | <b>Increased</b>             | <b>135 (78.9%)</b> | <b>196 (85.2%)</b> | <b>331 (82.5%)</b> | 0.202   |
|    |                                                                                          | I do not know                | 30 (17.5%)         | 26 (11.3%)         | 56 (14%)           |         |
| 28 | Where do we find fibre?                                                                  | <b>Fruits and vegetables</b> | <b>121 (70.8%)</b> | <b>209 (90.9%)</b> | <b>330 (82.3%)</b> |         |
|    |                                                                                          | Milk and dairy products      | 35 (20.5%)         | 13 (5.7%)          | 48 (12%)           | <0.001* |

|    |                                                                                                                                         |                                            |                    |                    |                    |        |
|----|-----------------------------------------------------------------------------------------------------------------------------------------|--------------------------------------------|--------------------|--------------------|--------------------|--------|
|    |                                                                                                                                         | Meat products                              | 0 (0%)             | 1 (0.4%)           | 1 (0.2%)           |        |
|    |                                                                                                                                         | I do not know                              | 15 (8.8%)          | 7 (3%)             | 22 (5.5%)          |        |
| 29 | How much kJ -approximately- is the daily energy intake of a pregnant woman increased in the 1st trimester?                              | <b>0 – 500 kJ</b>                          | <b>61 (35.7%)</b>  | <b>121 (52.6%)</b> | <b>182 (45.4%)</b> | 0.004* |
|    |                                                                                                                                         | 1250 kJ                                    | 22 (12.9%)         | 18 (7.8%)          | 40 (10%)           |        |
|    |                                                                                                                                         | 2500 kJ                                    | 18 (10.5%)         | 13 (5.7%)          | 31 (7.7%)          |        |
|    |                                                                                                                                         | I do not know                              | 69 (40.4%)         | 78 (33.9%)         | 147 (36.7%)        |        |
| 30 | How much kJ -approximately- is the daily energy intake of a pregnant woman increased in 2 <sup>nd</sup> and 3 <sup>rd</sup> trimesters? | <b>1250 kJ</b>                             | <b>66 (38.6%)</b>  | <b>109 (47.4%)</b> | <b>175 (43.6%)</b> | 0.038* |
|    |                                                                                                                                         | 3500 kJ                                    | 20 (11.7%)         | 30 (13%)           | 50 (12.5%)         |        |
|    |                                                                                                                                         | 4500 kJ                                    | 8 (4.7%)           | 2 (0.9%)           | 10 (2.5%)          |        |
|    |                                                                                                                                         | I do not know                              | 77 (45%)           | 89 (38.7%)         | 166 (41.4%)        |        |
| 31 | Which food do you think corresponds approximately to an energy intake of 1500 kJ?                                                       | <b>150g white yoghurt and 40g muesli</b>   | <b>32 (18.7%)</b>  | <b>73 (31.7%)</b>  | <b>105 (26.2%)</b> | 0.007* |
|    |                                                                                                                                         | Tomato sauce with beef and pasta           | 39 (22.8%)         | 50 (21.7%)         | 89 (22.2%)         |        |
|    |                                                                                                                                         | A plate of pure beef broth with vegetables | 26 (15.2%)         | 40 (17.4%)         | 66 (16.5%)         |        |
|    |                                                                                                                                         | I do not know                              | 73 (42.7%)         | 67 (29.1%)         | 140 (34.9%)        |        |
| 32 | Women who are not overweight at the beginning of pregnancy are recommended to gain weight during pregnancy...                           | 10 – 12.5 Kg                               | 90 (52.6%)         | 117 (50.9%)        | 207 (51.6%)        | 0.007* |
|    |                                                                                                                                         | <b>11.4 – 16 Kg</b>                        | <b>46 (26.9%)</b>  | <b>89 (38.7%)</b>  | <b>135 (33.7%)</b> |        |
|    |                                                                                                                                         | 15 – 18 Kg                                 | 8 (4.7%)           | 3 (1.3%)           | 11 (2.7%)          |        |
|    |                                                                                                                                         | I do not know                              | 27 (15.8%)         | 20 (8.7%)          | 47 (11.7%)         |        |
| 33 | Women who are overweight at the beginning of pregnancy are advised to gain weight during pregnancy...                                   | <b>7 – 11.5 Kg</b>                         | <b>79 (46.2%)</b>  | <b>106 (46.1%)</b> | <b>185 (46.1%)</b> | 0.997  |
|    |                                                                                                                                         | 8 – 10 Kg                                  | 43 (25.1%)         | 57 (24.8%)         | 100 (24.9%)        |        |
|    |                                                                                                                                         | 11.4 – 16 Kg                               | 6 (3.5%)           | 9 (3.9%)           | 15 (3.7%)          |        |
|    |                                                                                                                                         | I do not know                              | 43 (25.1%)         | 58 (25.2%)         | 101 (25.2%)        |        |
| 34 | Excessive weight gain during pregnancy can negatively affect...                                                                         | Only maternal health                       | 15 (8.8%)          | 10 (4.3%)          | 25 (6.2%)          | 0.017  |
|    |                                                                                                                                         | Only fetal health                          | 13 (7.6%)          | 21 (9.1%)          | 34 (8.5%)          |        |
|    |                                                                                                                                         | <b>Maternal and fetal health</b>           | <b>128 (74.9%)</b> | <b>192 (83.5%)</b> | <b>320 (79.8%)</b> |        |
|    |                                                                                                                                         | I do not know                              | 15 (8.8%)          | 7 (3%)             | 22 (5.5%)          |        |
| 35 | When is it recommended for women to start taking folic acid?                                                                            | <b>1 month before conception</b>           | <b>142 (83%)</b>   | <b>214 (93%)</b>   | <b>356 (88.8%)</b> | 0.006* |
|    |                                                                                                                                         | Only during pregnancy                      | 18 (10.5%)         | 10 (4.3%)          | 28 (7%)            |        |
|    |                                                                                                                                         | At the end of pregnancy                    | 1 (0.6%)           | 0 (0%)             | 1 (0.2%)           |        |
|    |                                                                                                                                         | I do not know                              | 10 (5.8%)          | 5 (2.2%)           | 15 (3.7%)          |        |
| 36 | During pregnancy, a woman should receive vitamin A...                                                                                   | <b>Increased through diet</b>              | <b>50 (29.2%)</b>  | <b>71 (30.9%)</b>  | <b>121 (30.2%)</b> | 0.004* |
|    |                                                                                                                                         | Limited                                    | 29 (17%)           | 69 (30%)           | 98 (24.4%)         |        |
|    |                                                                                                                                         | As food supplements                        | 20 (11.7%)         | 14 (6.1%)          | 34 (8.5%)          |        |
|    |                                                                                                                                         | I do not know                              | 70 (40.9%)         | 76 (33%)           | 146 (36.4%)        |        |
| 37 | Which of the listed fish has a higher mercury content?                                                                                  | <b>Pike</b>                                | <b>20 (11.7%)</b>  | <b>45 (19.6%)</b>  | <b>65 (16.2%)</b>  | 0.037  |
|    |                                                                                                                                         | Salmon                                     | 45 (26.3%)         | 55 (23.9%)         | 100 (24.9%)        |        |
|    |                                                                                                                                         | Cod                                        | 49 (28.7%)         | 77 (33.5%)         | 126 (31.4%)        |        |
|    |                                                                                                                                         | I do not know                              | 57 (33.3%)         | 53 (23%)           | 110 (27.4%)        |        |

|    |                                                                                                            |                                                 |                    |                    |                    |        |
|----|------------------------------------------------------------------------------------------------------------|-------------------------------------------------|--------------------|--------------------|--------------------|--------|
| 38 | <i>Listeria monocytogenes</i> is a bacterium that a pregnant woman can become infected with when eating... | <b>Soft-ripened cheese with fungal cultures</b> | <b>125 (73.1%)</b> | <b>168 (73%)</b>   | <b>293 (73.1%)</b> | 0.431* |
|    |                                                                                                            | Canned meat                                     | 3 (1.8%)           | 7 (3%)             | 10 (2.5%)          |        |
|    |                                                                                                            | Contaminated water                              | 9 (5.3%)           | 16 (7%)            | 25 (6.2%)          |        |
|    |                                                                                                            | I do not know                                   | 34 (19.9%)         | 36 (15.7%)         | 70 (17.5%)         |        |
| 39 | <i>Salmonella</i> is a bacterium that a pregnant woman can become infected with, especially when eating... | Improper washing of fruits and vegetables       | 9 (5.3%)           | 11 (4.8%)          | 20 (5%)            | 0.437* |
|    |                                                                                                            | <b>Undercooked meat and eggs</b>                | <b>155 (90.6%)</b> | <b>216 (93.9%)</b> | <b>371 (92.5%)</b> |        |
|    |                                                                                                            | When reheating food                             | 1 (0.6%)           | 0 (0%)             | 1 (0.2%)           |        |
|    |                                                                                                            | I do not know                                   | 4 (2.3%)           | 2 (0.9%)           | 6 (1.5%)           |        |
| 40 | <i>Listeria</i> mainly poses a risk during pregnancy...                                                    | Food poisoning                                  | 28 (16.4%)         | 41 (17.8%)         | 69 (17.2%)         | 0.900* |
|    |                                                                                                            | <b>Miscarriage/stillbirth</b>                   | <b>75 (43.9%)</b>  | <b>100 (43.5%)</b> | <b>175 (43.6%)</b> |        |
|    |                                                                                                            | Excruciating pain                               | 5 (2.9%)           | 10 (4.3%)          | 15 (3.7%)          |        |
|    |                                                                                                            | I do not know                                   | 63 (36.8%)         | 78 (33.9%)         | 141 (35.2%)        |        |

Chi-squared test ( $\chi^2$ ) and Fisher's exact test (\*) were used with a significance level  $\leq 0.05$ . The correct answers were highlighted in bold font.

**Table S2.** Nutritional Health Misconceptions Scores of Pregnant Women Participating in the Nutritional Health Survey, April – May 2022, (*n* = 401)

| Variable         | Outcome              | Misconception I<br>(1 – 5) | Sig.  | Misconception II<br>(1 – 5) | Sig.         | Misconception III<br>(1 – 5) | Sig.         | Misconception IV<br>(1 – 5) | Sig.   | Misconception V<br>(1 – 5) | Sig.         |
|------------------|----------------------|----------------------------|-------|-----------------------------|--------------|------------------------------|--------------|-----------------------------|--------|----------------------------|--------------|
| <b>Age</b>       | ≤ 28 yo              | 1.5 ± 0.7                  | 0.748 | 1.8 ± 1.0                   | 0.312        | 3.3 ± 1.2                    | <0.001       | 2.6 ± 1.2                   | 0.887  | 3.3 ± 1.1                  | <b>0.017</b> |
|                  | > 28 yo              | 1.5 ± 0.8                  |       | 1.6 ± 0.7                   |              | 2.8 ± 1.2                    |              | 2.6 ± 1.2                   |        | 3.6 ± 1.1                  |              |
| <b>Education</b> | Pre-Uni              | 1.5 ± 0.6                  | 0.726 | 1.8 ± 1.0                   | <b>0.002</b> | 3.2 ± 1.2                    | <0.001       | 2.8 ± 1.2                   | <0.001 | 3.7 ± 1.0                  | <b>0.024</b> |
|                  | University           | 1.6 ± 0.8                  |       | 1.5 ± 0.6                   |              | 2.7 ± 1.2                    |              | 2.4 ± 1.1                   |        | 3.4 ± 1.1                  |              |
| <b>City</b>      | Prague               | 1.6 ± 0.8                  | 0.296 | 1.6 ± 0.7                   | 0.431        | 2.8 ± 1.2                    | <b>0.022</b> | 2.6 ± 1.1                   | 0.928  | 3.5 ± 1.1                  | 0.779        |
|                  | Plzen                | 1.4 ± 0.6                  |       | 1.7 ± 1.0                   |              | 3.1 ± 1.3                    |              | 2.6 ± 1.2                   |        | 3.5 ± 1.1                  |              |
| <b>Pregnancy</b> | First                | 1.6 ± 0.8                  | 0.757 | 1.6 ± 0.8                   | 0.253        | 2.9 ± 1.2                    | 0.615        | 2.6 ± 1.2                   | 0.812  | 3.4 ± 1.0                  | <b>0.041</b> |
|                  | ≥ Second             | 1.5 ± 0.7                  |       | 1.7 ± 0.8                   |              | 2.9 ± 1.2                    |              | 2.6 ± 1.2                   |        | 3.6 ± 1.1                  |              |
| <b>Trimester</b> | 2 <sup>nd</sup> Trim | 1.3 ± 0.6                  | 0.726 | 1.3 ± 0.6                   | 0.539        | 2.7 ± 1.2                    | 0.738        | 2.7 ± 0.6                   | 0.779  | 3.7 ± 0.6                  | 0.983        |
|                  | 3 <sup>rd</sup> Trim | 1.5 ± 0.8                  |       | 1.6 ± 0.8                   |              | 2.9 ± 1.2                    |              | 2.6 ± 1.2                   |        | 3.5 ± 1.1                  |              |
| <b>BMI</b>       | < 18.5               | 1.6 ± 1.1                  | 0.261 | 1.9 ± 1.2                   | 0.935        | 3.0 ± 1.2                    | 0.894        | 2.4 ± 1.2                   | 0.454  | 3.0 ± 1.2                  | 0.121        |
|                  | 18.5 – 24.9          | 1.5 ± 0.7                  |       | 1.6 ± 0.8                   |              | 2.9 ± 1.2                    |              | 2.6 ± 1.2                   |        | 3.5 ± 1.1                  |              |
|                  | 25 – 29.9            | 1.5 ± 0.8                  |       | 1.6 ± 0.8                   |              | 2.9 ± 1.2                    |              | 2.6 ± 1.0                   |        | 3.7 ± 1.1                  |              |
|                  | 30 – 34.9            | 1.9 ± 1.1                  |       | 1.7 ± 0.8                   |              | 2.8 ± 1.2                    |              | 2.6 ± 1.2                   |        | 3.6 ± 0.9                  |              |
|                  | ≥ 35                 | 1.4 ± 0.5                  |       | 1.8 ± 1.1                   |              | 3.1 ± 1.4                    |              | 3.0 ± 1.1                   |        | 3.7 ± 0.9                  |              |
| <b>BMI Level</b> | UW & EO              | 1.5 ± 0.8                  | 0.447 | 1.8 ± 1.1                   | 0.539        | 3.1 ± 1.3                    | 0.439        | 2.7 ± 1.2                   | 0.415  | 3.3 ± 1.1                  | 0.187        |
|                  | N & O                | 1.5 ± 0.8                  |       | 1.6 ± 0.8                   |              | 2.9 ± 1.2                    |              | 2.6 ± 1.2                   |        | 3.6 ± 1.1                  |              |
| <b>NCD</b>       | No                   | 1.5 ± 0.8                  | 0.442 | 1.7 ± 0.8                   | <b>0.050</b> | 3.0 ± 1.2                    | 0.118        | 2.6 ± 1.2                   | 0.343  | 3.5 ± 1.1                  | 0.333        |
|                  | Yes                  | 1.5 ± 0.8                  |       | 1.5 ± 0.7                   |              | 2.8 ± 1.2                    |              | 2.5 ± 1.0                   |        | 3.6 ± 1.1                  |              |
| <b>Medicines</b> | No                   | 1.6 ± 0.8                  | 0.802 | 1.7 ± 0.9                   | 0.148        | 3.1 ± 1.2                    | 0.042        | 2.7 ± 1.3                   | 0.350  | 3.4 ± 1.2                  | 0.098        |
|                  | Yes                  | 1.5 ± 0.8                  |       | 1.6 ± 0.7                   |              | 2.8 ± 1.2                    |              | 2.5 ± 1.1                   |        | 3.6 ± 1.0                  |              |
| <b>Alt. Diet</b> | No                   | 1.5 ± 0.8                  | 0.396 | 1.6 ± 0.8                   | 0.297        | 2.9 ± 1.2                    | 0.500        | 2.6 ± 1.2                   | 0.835  | 3.5 ± 1.1                  | 0.737        |
|                  | Yes                  | 1.3 ± 0.5                  |       | 1.4 ± 0.7                   |              | 3.2 ± 1.4                    |              | 2.6 ± 1.4                   |        | 3.7 ± 0.9                  |              |
| <b>Total</b>     |                      | 1.5 ± 0.8                  |       | 1.6 ± 0.8                   |              | 2.9 ± 1.2                    |              | 2.6 ± 1.2                   |        | 3.5 ± 1.1                  |              |

Mann-Whitney test (*U*) and Kruskal-Wallis test (*H*) were used with a significance level ≤ 0.05. UW & EO = Underweight and Extremely Obese. N & O = Normal and Obese.

**Table S3.** Nutritional Health Knowledge Scores of Pregnant Women Participating in the Nutritional Health Survey, April – May 2022, (*n* = 401)

| Number of points obtained | Number of participants | Number of respondents relatively |
|---------------------------|------------------------|----------------------------------|
| 4                         | 1                      | 0,25%                            |
| 6                         | 2                      | 0,50%                            |
| 8                         | 2                      | 0,50%                            |
| 10                        | 1                      | 0,25%                            |
| 11                        | 2                      | 0,50%                            |
| 12                        | 2                      | 0,50%                            |
| 13                        | 4                      | 1,00%                            |
| 14                        | 2                      | 0,50%                            |
| 15                        | 7                      | 1,75%                            |
| 16                        | 8                      | 2,00%                            |
| 17                        | 3                      | 0,75%                            |
| 18                        | 10                     | 2,49%                            |
| 19                        | 12                     | 2,99%                            |
| 20                        | 24                     | 5,99%                            |
| 21                        | 16                     | 3,99%                            |
| 22                        | 17                     | 4,24%                            |
| 23                        | 20                     | 4,99%                            |
| 24                        | 30                     | 7,48%                            |
| 25                        | 34                     | 8,48%                            |
| 26                        | 35                     | 8,73%                            |
| 27                        | 32                     | 7,98%                            |
| 28                        | 34                     | 8,48%                            |
| 29                        | 31                     | 7,73%                            |
| 30                        | 25                     | 6,23%                            |
| 31                        | 15                     | 3,74%                            |
| 32                        | 13                     | 3,24%                            |
| 33                        | 10                     | 2,49%                            |
